1

2

3 **Title:** The natural sequence of events in larval settlement and metamorphosis of *Hydroides*

4 *elegans* (Polychaeta; Serpulidae)

5

6 **Short title:** Sequencing events in larval settlement of *Hydroides elegans*

7

8 Michael G. Hadfield\*<sup>¶</sup>, Marnie L. Freckelton<sup>¶</sup> & Brian T. Nedved<sup>¶</sup>

9

10 Kewalo Marine Laboratory, University of Hawai'i at Mānoa, Honolulu, Hawai'i, U.S.A

11

12

13

14 \*Corresponding author

15 E-mail: [hadfield@hawaii.edu](mailto:hadfield@hawaii.edu)

16

17 <sup>¶</sup>All authors contributed equally to this work.

18 **Abstract**

19 The broadly distributed serpulid worm *Hydroides elegans* has become a model organism for  
20 studies of marine biofouling, development and the processes of larval settlement and  
21 metamorphosis induced by surface microbial films. Contrasting descriptions of the initial events  
22 of these recruitment processes, whether settlement is induced by (1) natural multi-species  
23 biofilms, (2) biofilms composed of single bacterial species known to induce settlement, or (3) a  
24 bacterial extract stimulated the research described here. We found that settlement induced by  
25 natural biofilms or biofilms formed by the bacterium *Pseudoalteromonas luteoviolacea* is  
26 invariably initiated by attachment and secretion of an adherent and larva-enveloping primary  
27 tube, followed by loss of motile cilia and ciliated cells and morphogenesis. The bacterial extract  
28 containing complex tailocin arrays derived from an assemblage of phage genes incorporated  
29 into the bacterial genome appears to induce settlement events by destruction of larval cilia and  
30 ciliated cells, followed by attachment and primary-tube formation. Similar destruction occurred  
31 when precompetent larvae and larvae of a nudibranch gastropod were exposed to the extract,  
32 neither of which metamorphosed. We further argue that larvae that lose their cilia before  
33 attachment would be swept away from the sites that stimulated settlement by the turbulent  
34 flow characteristic of most marine habitats.

35 **Introduction**

36 The life cycle of the warm-water, marine, biofouling, serpulid polychaete *Hydroides elegans*  
37 (Haswell, 1883) has been described in many publications [e.g., 1,2] (Fig. 1). Sessile adult worms  
38 live in bays and estuaries attached to rocks, mangrove roots and, problematically, the hulls of  
39 ships and the pilings where they dock. Separate sexes spawn gametes into the surrounding

40 waters where fertilization and larval development take place. At water temperatures about  
41 25°C, larvae begin feeding 12 h after fertilization and are metamorphically competent on day 5  
42 [2]. Settlement and metamorphosis readily progress when, and only when, competent larvae  
43 physically contact a microbially biofilmed marine surface [3–5].

44

45 Fig. 1. The life cycle of *H. elegans*. (A) Mature population of *H. elegans*. (B) Close up of an adult  
46 *H. elegans*. (C) competent larva of *H. elegans*. (D) biofilm bacterial surface required for larval  
47 metamorphosis. (E) early juvenile of *H. elegans*. Scale bars: A, 5cm; B, 1 cm; C, 50µm; D, 5 µm;  
48 E, 50 µm.

49

50 In the past 25 years, much of the settlement and metamorphosis processes of *H. elegans* has  
51 been substantiated in both our and other laboratories. It is known, for example, that  
52 settlement of competent larvae increases with increasing bacterial density on a surface, and  
53 that, in a natural biofilm, settlement is cued by many different, but not all, bacterial species  
54 [3,4,6,7]. Further, larvae must physically contact a biofilmed surface to perceive the bacterial  
55 cue to settle. Larvae exhibit no settlement behavior when separated from a biofilmed surface  
56 by as few as 20 µm; i.e., **there is no soluble settlement cue from bacteria in a natural biofilm**  
57 [8].

58

59 Of the marine bacteria that induce larvae of *H. elegans* to settle, one that has been intensely  
60 studied is the globally distributed, gram-negative gammaproteobacterium *Pseudoalteromonas*  
61 *luteoviolacea*. This bacterium has been found to synthesize structures, now known as tailocins,

62 from a gene set gained from a T4-type bacteriophage [9,10]. These complex arrays of tailocins  
63 produced by inductive strains of *P. luteoviolacea* were originally dubbed metamorphosis-  
64 associated contractile systems, MACs [10]. However, neither arrays of tailocins nor their  
65 individual elements are found in some other inductive biofilm bacterial species, suggesting that  
66 other structures must be involved [11].

67  
68 In a more recent paper by Shikuma et al. [11] focused on the early transcriptional events in  
69 larvae of *H. elegans* that have been cued to settle and metamorphosis in response to the  
70 tailocin arrays isolated in a crude preparation from *P. luteoviolacea*. The authors reported that  
71 the settlement process begins with loss of the prototrochal cilia that both propel and feed the  
72 larva [11]. This was in contrast to the report of Carpizo-Ituarte and Hadfield [1], who noted that  
73 settling larvae of *H. elegans* first tether themselves to a selected surface via a mucous thread,  
74 next secrete an encompassing primary tube attached to the surface, and then, enclosed in the  
75 primary tube, lose their motile cilia. Furthermore, larvae of *H. elegans* exist in a world of  
76 turbulent flow, even in bays and harbors. At our field site in Pearl Harbor, Hawai'i, a habitat for  
77 *H. elegans*, we measured flow rates of  $<6 \text{ cm s}^{-1}$  and turbulence from wind chop and ship wakes  
78 [12]. This strongly suggests that 'anchor first, metamorphose second,' must be the rule for a  
79 settling larva to avoid being swept away after losing its motile cilia during metamorphosis. We  
80 have thus re-visited the question and compared the order of metamorphic events when  
81 competent larvae of *H. elegans* contact a naturally occurring biofilmed surface, a single-species  
82 biofilm of the inductive bacterium *P. luteoviolacea*, or are induced to settle by the semi-purified  
83 tailocin arrays from *P. luteoviolacea* described and labeled "MACs" by Shikuma et al. [10]. We

84 visually followed and video-recorded the settlement and developmental events for 30 – 60  
85 minutes and recorded the timing of each.

86

87 Because the observations made during the procedures described above suggested that the  
88 action of tailocin arrays was primarily destruction of cilia and ciliated cells, we performed two  
89 additional experiments. First, we exposed pre-competent larvae of *H. elegans* -- that is, larvae  
90 not yet developmentally capable of undergoing metamorphosis -- to the tailocin-array  
91 preparation to determine if these larvae might suffer destruction of their prototrochal cells or  
92 cilia. Secondly, we exposed competent veliger larvae of the coral-eating nudibranch gastropod  
93 *Phestilla sibogae*, who metamorphose only in response to a soluble cue from their prey coral,  
94 to the tailocin-array preparation to determine if the prominent ciliated cells of the velum,  
95 responsible for swimming and feeding, would be affected.

96

## 97 **Materials and Methods**

98 *Culture of H. elegans.* Adult worms were collected at our field site in Pearl Harbor, Hawai'i and  
99 maintained in running seawater at the Kewalo Marine Laboratory, Honolulu, HI (KML). We  
100 spawned adult worms and reared larvae of *H. elegans* according to the protocols described by  
101 Nedved and Hadfield [2]. Metamorphically competent larvae, 5 – 6 days postfertilization, were  
102 induced to settle by three different preparations: (1) a natural biofilm; (2) a monospecific  
103 biofilm of *P. luteoviolacea* (H1 strain); or (3) exposure to a suspension of the inductive tailocin  
104 arrays (MACs) of *P. luteoviolacea*.

105

106 *Experimental preparations.* Natural biofilms were accumulated on glass microslides by  
107 submersion for three weeks or longer in aquaria at the KML supplied with continuously flowing,  
108 unfiltered seawater in either an open position exposed to ambient light (WT-BF) or in a black  
109 container without light (BB-BF). The biofilms formed in the latter lack the heavy coating of  
110 diatoms that develop on slides exposed in natural light. These slides were scored with a  
111 diamond tipped pen, broken, and a piece of the biofilmed slide (approx. 22 mm X 22 mm) was  
112 used as an inductive cue. Monospecific biofilms of *P. luteoviolacea* H1 were allowed to form on  
113 pieces of glass microslides by inoculating them with  $10^7$  cells ml<sup>-1</sup> from an overnight broth  
114 culture of *P. luteoviolacea* for 1 h [6]. The crude preparation of tailocin arrays and other cell  
115 products from *P. luteoviolacea* was prepared as per Shikuma et al. [10]. A 100-fold dilution in  
116 0.22 µm double-filtered, autoclaved seawater (DFASW) of this preparation was used as the cue.

117 *Treatment of competent larvae of H. elegans.* Mono- and multi-species biofilmed slide pieces  
118 were put onto a complete microscope slide for handling. An aliquot of 0.22 µm-filtered  
119 seawater (FSW) containing competent larvae of *H. elegans* was added to the top of the slide  
120 fragment. To administer the tailocin-array preparation, larvae were added to a 35 mm petri  
121 dish containing the diluted preparation, and an aliquot of this mixture was added to a clean  
122 microscope slide for observation.

123

124 *Treatment of pre-competent larvae of H. elegans and larvae of a nudibranch.* We exposed 2-day  
125 old, pre-competent trochophore larvae of *H. elegans* and veliger larvae of the nudibranch  
126 gastropod *Phestilla sibogae* to the tailocin-array preparation and recorded the results as

127 described below. Veliger larvae were obtained from a captive population of *P. sibogae*  
128 maintained at KML.  
129  
130 *Video-recording.* After adding larvae to each of the above preparations, they were observed  
131 under a dissecting microscope to determine if they had begun the slow, circular swimming  
132 characteristic of pre-settlement behavior for the *Hydroïdes* larvae, or slow swimming while  
133 gliding across the surface, foot down, for the *Phestilla* larvae. When these behaviors were  
134 observed, a coverslip with supports at each corner was added to the slide, and it was  
135 transferred to the stage of a Zeiss microscope equipped for bright-field, phase-contrast and  
136 interference-contrast microscopy. The larvae were then observed, and their behavior video  
137 recorded with a camera (Canon Rebel T1i EOS 500D) mounted on the microscope. Additionally,  
138 the sequences, timing and durations of their behavioral events were manually recorded. Video  
139 recordings were made of larvae from ten different larval cultures over a five-month period.  
140 During recording, we particularly focused on the initial events involving larval attachment, cilia  
141 loss and primary-tube formation.  
142  
143 *Event sequence analysis:* The settlement and metamorphosis events were analyzed using  
144 hierarchical clustering with the TraMineR package in R (version 2.2-0.1) [13, 14]. Event  
145 sequences were clustered using the Optimal Matching for the dissimilarity matrix [13–15]. This  
146 method focuses on the order of events rather than the time spent in each event. Samples are  
147 clustered based on similarity, with differences in the sequences receiving a gap penalty 1 and a

148 single substitution cost of 2. Larval searching behavior, attachment, cilia loss, cell loss and  
149 primary tube formation were included in the analysis.

150

## 151 **Results**

152 While timing of the onset of events varied from larva to larva, when larvae were exposed to a  
153 natural multispecies biofilm the order of events was always the same: (1) the larvae stop  
154 swimming by attaching to the substratum with a mucus strand (Fig. 2); (2) the larvae secrete a  
155 transparent primary tube which encases the entire larva, but remains open at the anterior end  
156 (Figs. 2 and 3a); (3) the larvae shed their prototroch cilia, and their collars deflect anteriorly  
157 (Figs. 2 and 3b); (4) the larvae shed their food groove cells and evert the toe-like neuropodia  
158 from the posterior edge of their third segment (Figs. 2 and 3c); (5) the larvae begin to remodel  
159 the episphere and develop branchial filaments. When larvae were exposed to a biofilm  
160 composed only of *P. luteoviolacea*, this sequence was also largely the same, with all larvae  
161 attaching and secreting primary tubes before loss of cilia (Fig. 2) (See Supporting Table ST1 and  
162 Supporting Video SV1). In both instances, shed cilia and cells are typically directed to the food  
163 groove toward and the mouth and swallowed (see Supporting Video SV1).

164

165 Fig. 2. Dendrogram of Hierarchical Cluster Analysis using Optimal Matching generated with the  
166 TraMineR package [13]. The height of the vertical lines reflects the level of separation. Below the  
167 dendrogram, the sequence of events for each sample is included. Samples are labelled according to the  
168 settlement inducing treatment they received: Tail Arr, semi-purified preparation of tailocin arrays and  
169 cellular products from *P. luteoviolacea*; PL BF, biofilm of *P. luteoviolacea*; BB BF, natural biofilms  
170 accumulated in the absence of light; WT BF, natural biofilms accumulated in the presence of light.



171

172 Fig. 3. Sequence of metamorphic events in competent larvae of *H. elegans* exposed to a natural biofilm.

173 A) prototroch cilia are still attached when primary tube begins to form.; B) Prototroch cilia shed while

174 larvae is in primary tube; C) Loss of food-groove cells and collar eversion. Scale bar 20  $\mu\text{m}$ . Ptc,

175 Prototroch cells; PT, Primary Tube; PC, shed Prototroch cilia; Col, collar; FGC, food groove cells.

176

177 When larvae were exposed to the crude extract of tailocin arrays and other cell products from

178 *P. luteoviolacea*, the sequence of events was highly variable but consisted mostly of the

179 following sequence: (i) stopped swimming while secreting copious mucus which did not act as a

180 tether; (ii) shed their prototroch cilia; (iii) shed their food-groove cells and prototroch cells (Figs.

181 2 and 4); and then, (iv) secreted a primary tube (Fig. 2)(Supporting Table ST1; Supporting Video

182 SV2). In all instances of exposure to the bacterial products, cilia loss was observed before

183 primary tube formation (Fig. 4). The entire contour of the larvae body became distorted during

184 response to treatment with the tailocin-array preparation. Because larvae are not enclosed in a

185 primary tube during loss of cilia and cells, these products, normally eaten during

186 metamorphosis, simply float away,

187

188 Fig. 4. Larva of *H. elegans* induced to metamorphose by a tailocins-array preparation. (A) loss of

189 prototroch cilia before attachment and primary-tube formation; (B) loss of food-groove cells

190 before attachment and primary-tube formation; (C) loss of prototroch cells before attachment

191 and primary-tube secretion. FGC, food-groove cells; PC, prototroch cilia; Ptc, prototroch cilia.

192 Scale bars, 50  $\mu\text{m}$ .

193

194 When pre-competent larvae of *H. elegans* were exposed to the crude preparation of tailocin  
195 arrays, they shed their prototrochal cells and cilia without undergoing any further stages of  
196 metamorphosis (Fig. 5) (Supporting Video SV3). And when the veliger larvae of the nudibranch  
197 *Phestilla sibogae* were similarly exposed, they also began to shed their large ciliated velar cells  
198 (Fig. 6) (Supporting Video SV4), which are homologues of the prototroch cells of other molluscs  
199 and polychaetes.

200

201 Fig. 5. Pre-competent larvae of *H. elegans* lose cilia and prototroch cells when exposed to the  
202 semi-purified tailocin arrays from *P. luteoviolacea*. (A) Untreated pre-competent trochophore  
203 larva of *H. elegans*. (B) Treated pre-competent larvae of *H. elegans* showing loss of prototroch  
204 cells and cilia. AT, apical tuft of cilia; PC, prototroch cells detaching from the larva. Scale bar =  
205 20  $\mu\text{m}$ .

206

207 Fig. 6. Larva of *P. sibogae* lose cilia when exposed to the semi-purified tailocin arrays from *P.*  
208 *luteoviolacea*. (A) Untreated larva from *P. sibogae* showing velar cilia; F: foot, V: velum. (B)  
209 Contracted larva exposed to tailocin arrays from *P. luteoviolacea* shed cilia and ciliated cells (C).  
210 Scale bar 100  $\mu\text{m}$ .

211

## 212 **Discussion**

213 An initial paper on the larval biology of *H. elegans* noted its dependence on marine biofilms to  
214 initiate settlement and metamorphosis [3]. Subsequently, many papers have appeared on this

215 topic focusing on both the bacterial specificity in settlement and the developmental biology of  
216 this widely distributed marine worm. Among the latter, Carpizo-Ituarte and Hadfield [1]  
217 characterized the events of settlement and metamorphosis on wild-type biofilms, noting the  
218 same sequence found in the current investigation: (1) surface exploration; (2) attachment; (3)  
219 primary-tube formation; (4) prototroch loss; and (5) morphogenesis of the anterior region.  
220 Investigations by Walters et al. [16] and Koehl and Hadfield [12] focused on details of the  
221 hydrodynamic forces in habitats inhabited by *H. elegans*, which revealed that larvae of this  
222 species are always subject to turbulent, laminar flow when attempting to settle. The studies  
223 made it clear that forming a strong attachment to a surface before loss of motility is of  
224 paramount importance to the recruitment of *H. elegans*. Flow rates of 2 – 6 cm/sec, measured  
225 along surfaces Pearl Harbor, HI [12], would carry a larva a meter or more from a selected  
226 settlement site within a second, had it not firmly attached at that site. Because of this, we  
227 reason that secretion of the primary tube *before* loss of the larval swimming organ, the  
228 prototroch, is crucial to successful recruitment.

229  
230 The difference in the order of metamorphic events induced by the crude preparation of tailocin  
231 arrays may also be simply a result of the experimental setup. The tailocin arrays of *P.*  
232 *luteoviolacea* are exceptionally delicate, and their activity can be destroyed by gentle filtration  
233 [10]. As a consequence, the current method of isolation uses low speed centrifugation to  
234 remove cells and produces a concentrated but complex solution which also contains outer  
235 membrane vesicles and other cellular materials [10, Fig. 2D]. It is also highly likely that the  
236 preparation contains secondary metabolites such as violacein and other lightweight cellular

237 debris. This experimental difficulty necessitates that the larvae are exposed to the tailocin  
238 arrays in the form of a bath to demonstrate the tailocin bioactivity. Since it has been clearly  
239 demonstrated with naturally occurring biofilms that larvae of *H. elegans* must physically touch  
240 the biofilms to detect and respond to the metamorphic cue, the use of a bath exposure,  
241 although a helpful screening tool, must be recognized as not ecologically relevant. This situation  
242 is far from unusual in the chemical ecology field, but it does serve as a timely reminder that  
243 experimental results do not always reflect the ecological context of the setting where the  
244 phenomenon under study would naturally occur.

245

246 In the competent larva of *H. elegans*, there are a number of transcripts that are regulated  
247 during stimulation of metamorphosis by the tailocin arrays from *P. luteoviolacea* [11]. The  
248 p38/JNK MAPK signaling pathways that are associated with metamorphosis in the larva appear  
249 to be implicated in the morphogenic events associated with metamorphosis and not cilia loss  
250 induced by tailocins [11]. However, in addition to their potential roles in cell adhesion and  
251 innate immunity, a subset of these transcripts is also associated with other cellular processes  
252 including defense against pathogens [17,18,19] and inflammatory responses [20]. The up and  
253 downregulation of these transcripts may also be a response to the cellular insult to the ciliated  
254 cells of the trochal bands by the tailocin preparations. The revelation that the order of  
255 morphogenetic events during settlement and metamorphosis of larval *H. elegans* is badly  
256 disturbed when induced by the crude tailocin extract confounds our ability to ascertain the true  
257 involvement of the identified transcripts in naturally induced metamorphosis of larvae of *H.*  
258 *elegans*.

259

260 The additional observations reported here, that the crude preparation of tailocin arrays is  
261 destructive to larval ciliated cells in pre-competent larvae of *H. elegans* and unrelated larvae of  
262 a nudibranch strongly, suggest that the complexes have a natural function other than inducing  
263 settlement of specific polychaete larvae. Perhaps their evolutionary value lies in destroying  
264 ciliated predators when cells of *P. luteoviolacea* are resident in biofilms. Freckelton et al.  
265 reported settlement induction by other bacterial species that lack the genes for tailocin arrays  
266 [20] and that lipopolysaccharide isolated from inductive *Cellulophaga lytica*, which does not  
267 make tailocins, induces larvae of *H. elegans* to settle [21]. There is still much to be learned  
268 about the induction of settlement in *H. elegans* by surface films made by any single bacterial  
269 species, and especially by *Pseudoalteromonas luteoviolacea*.

270

271 **Acknowledgments:**

272 The authors gratefully acknowledge the excellent laboratory assistance of Ms. Amy Knowles.

273 **References:**

- 274 1. Carpizo-Ituarte E, Hadfield MG. Stimulation of metamorphosis in the polychaete *Hydroides*  
275 *elegans* Haswell (Serpulidae). Biol Bull. 1998;194: 14–24.
- 276 2. Nedved BT, Hadfield MG. *Hydroides elegans* (Annelida: Polychaeta): A Model for Biofouling  
277 Research. Marine and Industrial Biofouling. 2008. pp. 203–217. doi:10.1007/7142
- 278 3. Hadfield MG, Unabia CC, Smith CM, Michael TM. Settlement preferences of the ubiquitous fouler  
279 *Hydroides elegans*. Recent developments in biofouling control. 1994. pp. 65–74.
- 280 4. Unabia CRC, Hadfield MG. Role of bacteria in larval settlement and metamorphosis of the  
281 polychaete *Hydroides elegans*. Mar Biol. 1999;133: 55–64. doi:10.1007/s002270050442

- 282 5. Lau SCK, Qian PY. Larval settlement in the serpulid polychaete *Hydroides elegans* in response to  
283 bacterial films: An investigation of the nature of putative larval settlement cue. *Mar Biol.*  
284 2001;138: 321–328. doi:10.1007/s002270000453
- 285 6. Huang S, Hadfield MG. Composition and density of bacterial biofilms determine larval settlement  
286 of the polychaete *Hydroides elegans*. *Mar Ecol Prog Ser.* 2003;260: 161–172.  
287 doi:10.3354/meps260161
- 288 7. Vijayan N, Hadfield MG. The microbial diversity of a marine biofilm that induces larvae of  
289 *Hydroides elegans* (Polychaeta) to settle and metamorphose. *Environ Microbiol.* 2020.
- 290 8. Hadfield MG, Nedved BT, Wilbur S, Koehl MAR. Biofilm cue for larval settlement in *Hydroides*  
291 *elegans* (Polychaeta): is contact necessary? *Mar Biol.* 2014;161: 2577–2587. doi:10.1007/s00227-  
292 014-2529-0
- 293 9. Huang Y, Callahan S, Hadfield MG. Recruitment in the sea: Bacterial genes required for inducing  
294 larval settlement in a polychaete worm. *Sci Rep.* 2012;2: 228. doi:10.1038/srep00228
- 295 10. Shikuma NJ, Pilhofer M, Weiss GL, Hadfield MG, Jensen GJ, Newman DK. Marine tubeworm  
296 metamorphosis induced by arrays of bacterial phage tail-like structures. *Science* (80- ). 2014;343:  
297 529–533. doi:10.1126/science.1246794
- 298 11. Shikuma NJ, Antoshechkin I, Medeiros JM, Pilhofer M, Newman DK. Stepwise metamorphosis of  
299 the tubeworm *Hydroides elegans* is mediated by a bacterial inducer and MAPK signaling. *Proc*  
300 *Natl Acad Sci.* 2016;113: 10097–10102. doi:10.1073/pnas.1603142113
- 301 12. Koehl MAR, Hadfield MG. Hydrodynamics of Larval Settlement from a Larva’s Point of View.  
302 *Integr Comp Biol.* 2010;50: 539–551.
- 303 13. Gabadinho A, Ritschard G, Müller NS, Studer M. Analyzing and Visualizing State Sequences in R  
304 with TraMineR. *J Stat Softw.* 2011;40: 1–37.
- 305 14. Gabadinho A, Ritschard G, Studer M, Müller NS. Mining Sequence Data in R with the TraMineR

- 306 package: A user's guide. Department of Econometrics and Laboratory of Demography, University  
307 of Geneva. 2009.
- 308 15. Studer M, Ritschard G. "What matters in differences between life trajectories: A comparative  
309 review of sequence dissimilarity measures",. J R Stat Soc Ser A. 2016;179: 481–511.
- 310 16. Walters L, Hadfield M, del Carmen K. The importance of larval choice and hydrodynamics in  
311 creating aggregations of *Hydroides elegans* (Polychaeta: Serpulidae). Invert Biol. 1997;116: 102–  
312 14.
- 313 17. Donpuksa S, Tassanakajon A, Rimphanitchayakit V. Domain inhibitory and bacteriostatic activities  
314 of the five-domain Kazal-type serine proteinase inhibitor from black tiger shrimp *Penaeus*  
315 *monodon*. Dev Comp Immunol. 2009;33: 481–8.
- 316 18. Ward S, O'Sullivan J, O'Donnell J. von Willebrand factor sialylation—A critical regulator of  
317 biological function. J Thromb Haemost. 2019;17: 1018– 1029.  
318 doi:<https://doi.org/10.1111/jth.14471>
- 319 19. Lenting PJ, Casari C, Christophe OD, Denis CV. von Willebrand factor: the old, the new and the  
320 unknown. J Thromb Haemost. 2012; 2428–2437. doi:<https://doi.org/10.1111/jth.12008>
- 321 20. Freckelton ML, Nedved BT, Hadfield MG. Induction of Invertebrate Larval Settlement; Different  
322 Bacteria, Different Mechanisms? Sci Rep. 2017;7. doi:10.1038/srep42557
- 323 21. Freckelton ML, Nedved BT, Cai Y-S, Cao S, Turano H, Alegado RA, Hadfield MG. 2020. Bacterial  
324 lipopolysaccharide induces settlement and metamorphosis in a marine larva. bioRxiv.  
325 [doi.org/10.1101/851519](https://doi.org/10.1101/851519)  
326

327 Supporting Information

328

329 **ST1 Table 1. Mean time and range, in minutes, to the start of the settlement**

330 **and metamorphosis events in *Hydroides elegans*.**

331

332 **SV1 Video 1. Sequence of metamorphic morphogenesis initiated by biofilms. A**

333 metamorphically competent larva of *Hydroides elegans* has been placed on a biofilm composed

334 of the bacterium *Pseudoalteromonas luteoviolacea* and videotaped as the events of

335 settlement/attachment and metamorphosis proceed. The observed events are the same when

336 a larva induced to settle by a complex, wild-type biofilm, but less easy to observe due to a

337 dense background of diatoms and cyanobacterial filaments. The primary tube is very

338 transparent and can best be seen when it accumulates bacterial cells from the underlying

339 biofilm. The larva moves constantly back and forth and rotates while secreting the primary

340 tube. Typically, cilia from the prototroch and the cells of the food groove are swept into the

341 food groove, then to the mouth and swallowed. FCG, food-groove cells; Muc, mucus; NP,

342 neuropodia; PT, primary tube.

343

344 **SV2 Video 2. Sequence of metamorphic morphogenesis initiated by tailocin arrays. A**

345 metamorphically competent larva of *Hydroides elegans* has been exposed to a suspension that

346 includes the crudely separated tailocin arrays produced by the bacterium *Pseudoalteromonas*

347 *luteoviolacea*, known to induce metamorphosis (see Shikuma et al. 2014). Without first

348 attaching, the larva sheds prototroch cilia, food groove cells and prototroch cells, and

349 subsequently produces a primary tube. Because the larva is not enclosed in a primary tube,



350 shed cilia and cells float away; they are typically eaten by a larva during normal metamorphosis.

351 FGC, food-groove cells; PC, prototroch cilia; PT, primary tube; Ptc, prototroch cells.

352

353 **SV3 Video 3. Tailocin arrays trigger loss of cilia and cells in precompetent larvae.** A

354 trochophore larva of *Hydroides elegans*, developmentally incapable of undergoing

355 metamorphosis, has been exposed to a suspension that includes the crudely separated tailocin

356 arrays produced by the bacterium *Pseudoalteromonas luteoviolacea*, known to induce

357 metamorphosis in competent larvae. The larva sheds both ciliated cells of its prototroch and

358 from its food groove. None of the larvae treated with the tailocins-array preparation underwent

359 metamorphosis. FGC, food-groove cell.

360

361 **SV4 Video 4. Tailocin arrays trigger loss of cilia and cells in veliger larvae.** A metamorphically

362 competent veliger larva of the nudibranch gastropod *Phestilla sibogae* has been exposed to a

363 suspension that includes the crudely separated tailocin arrays produced by the bacterium

364 *Pseudoalteromonas luteoviolacea*, known to induce metamorphosis in larvae of *Hydroides*

365 *elegans*. The larva retracts and secretes mucus from its foot, then begins to lose ciliated cells

366 from either its foot or velum. Soon after, the larva begins to shed the large multi-ciliated cells of

367 its velum. Retained for an additional 24 hours, none of the treated larvae metamorphosed. VC,

368 velar cell.

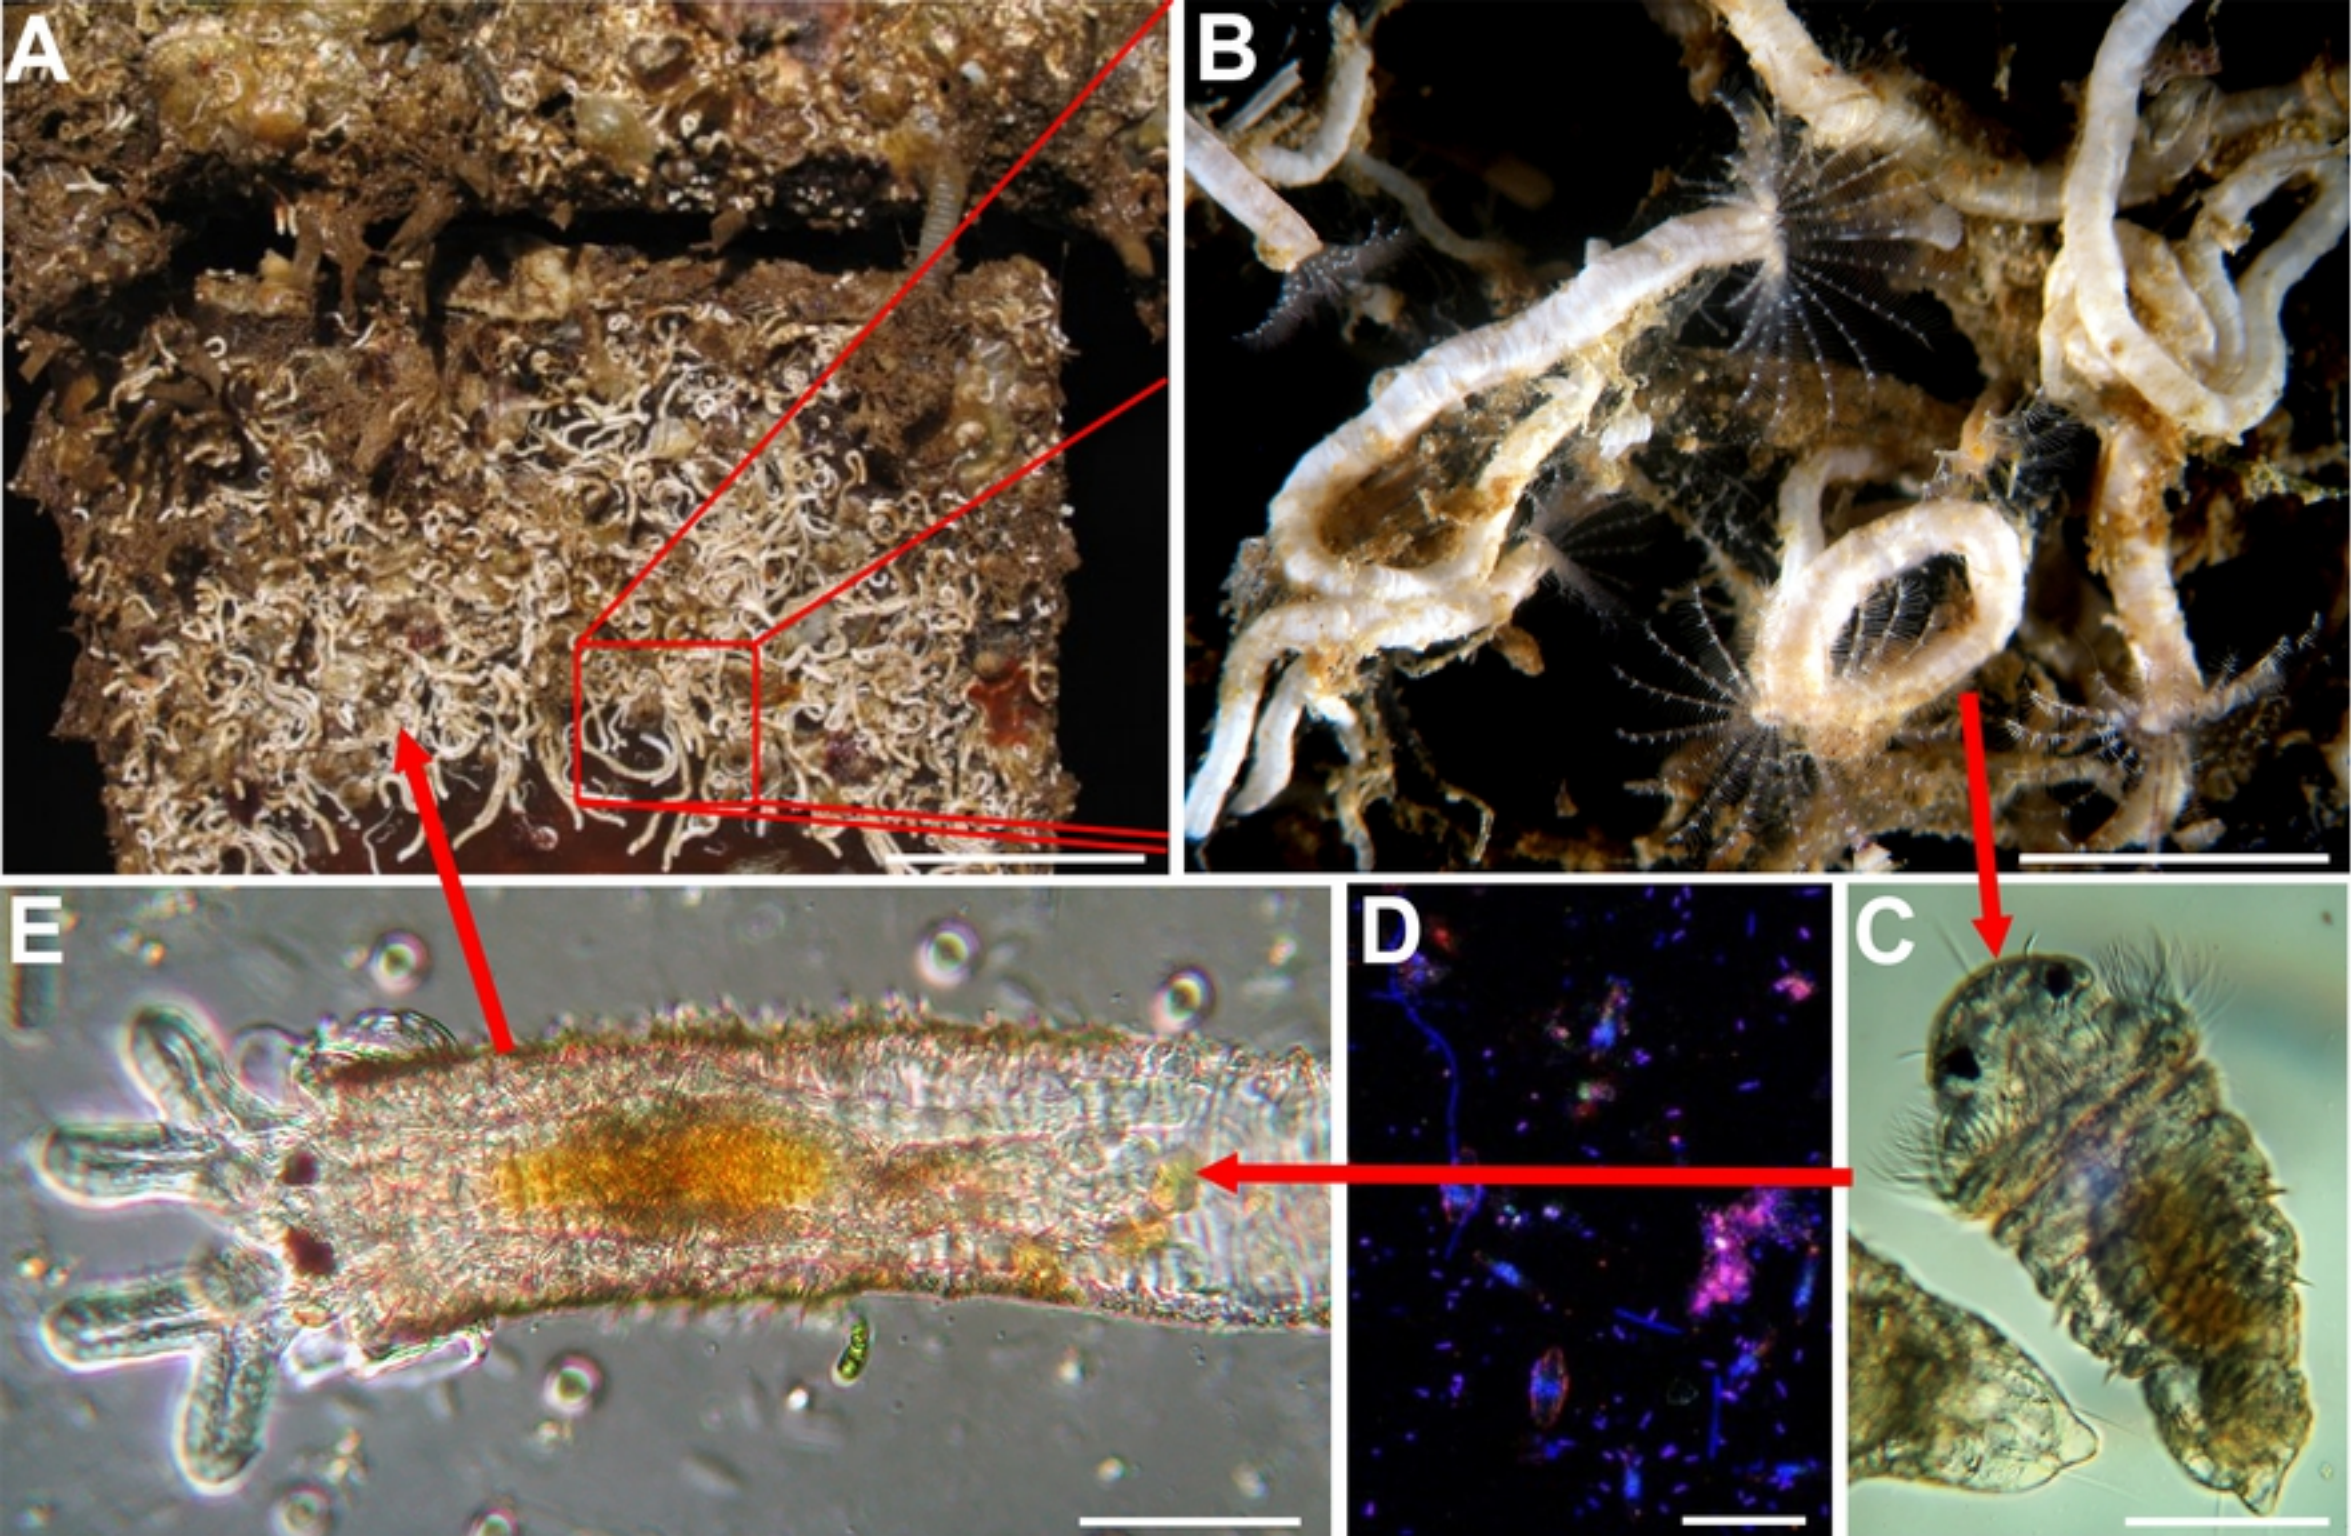

Figure 1

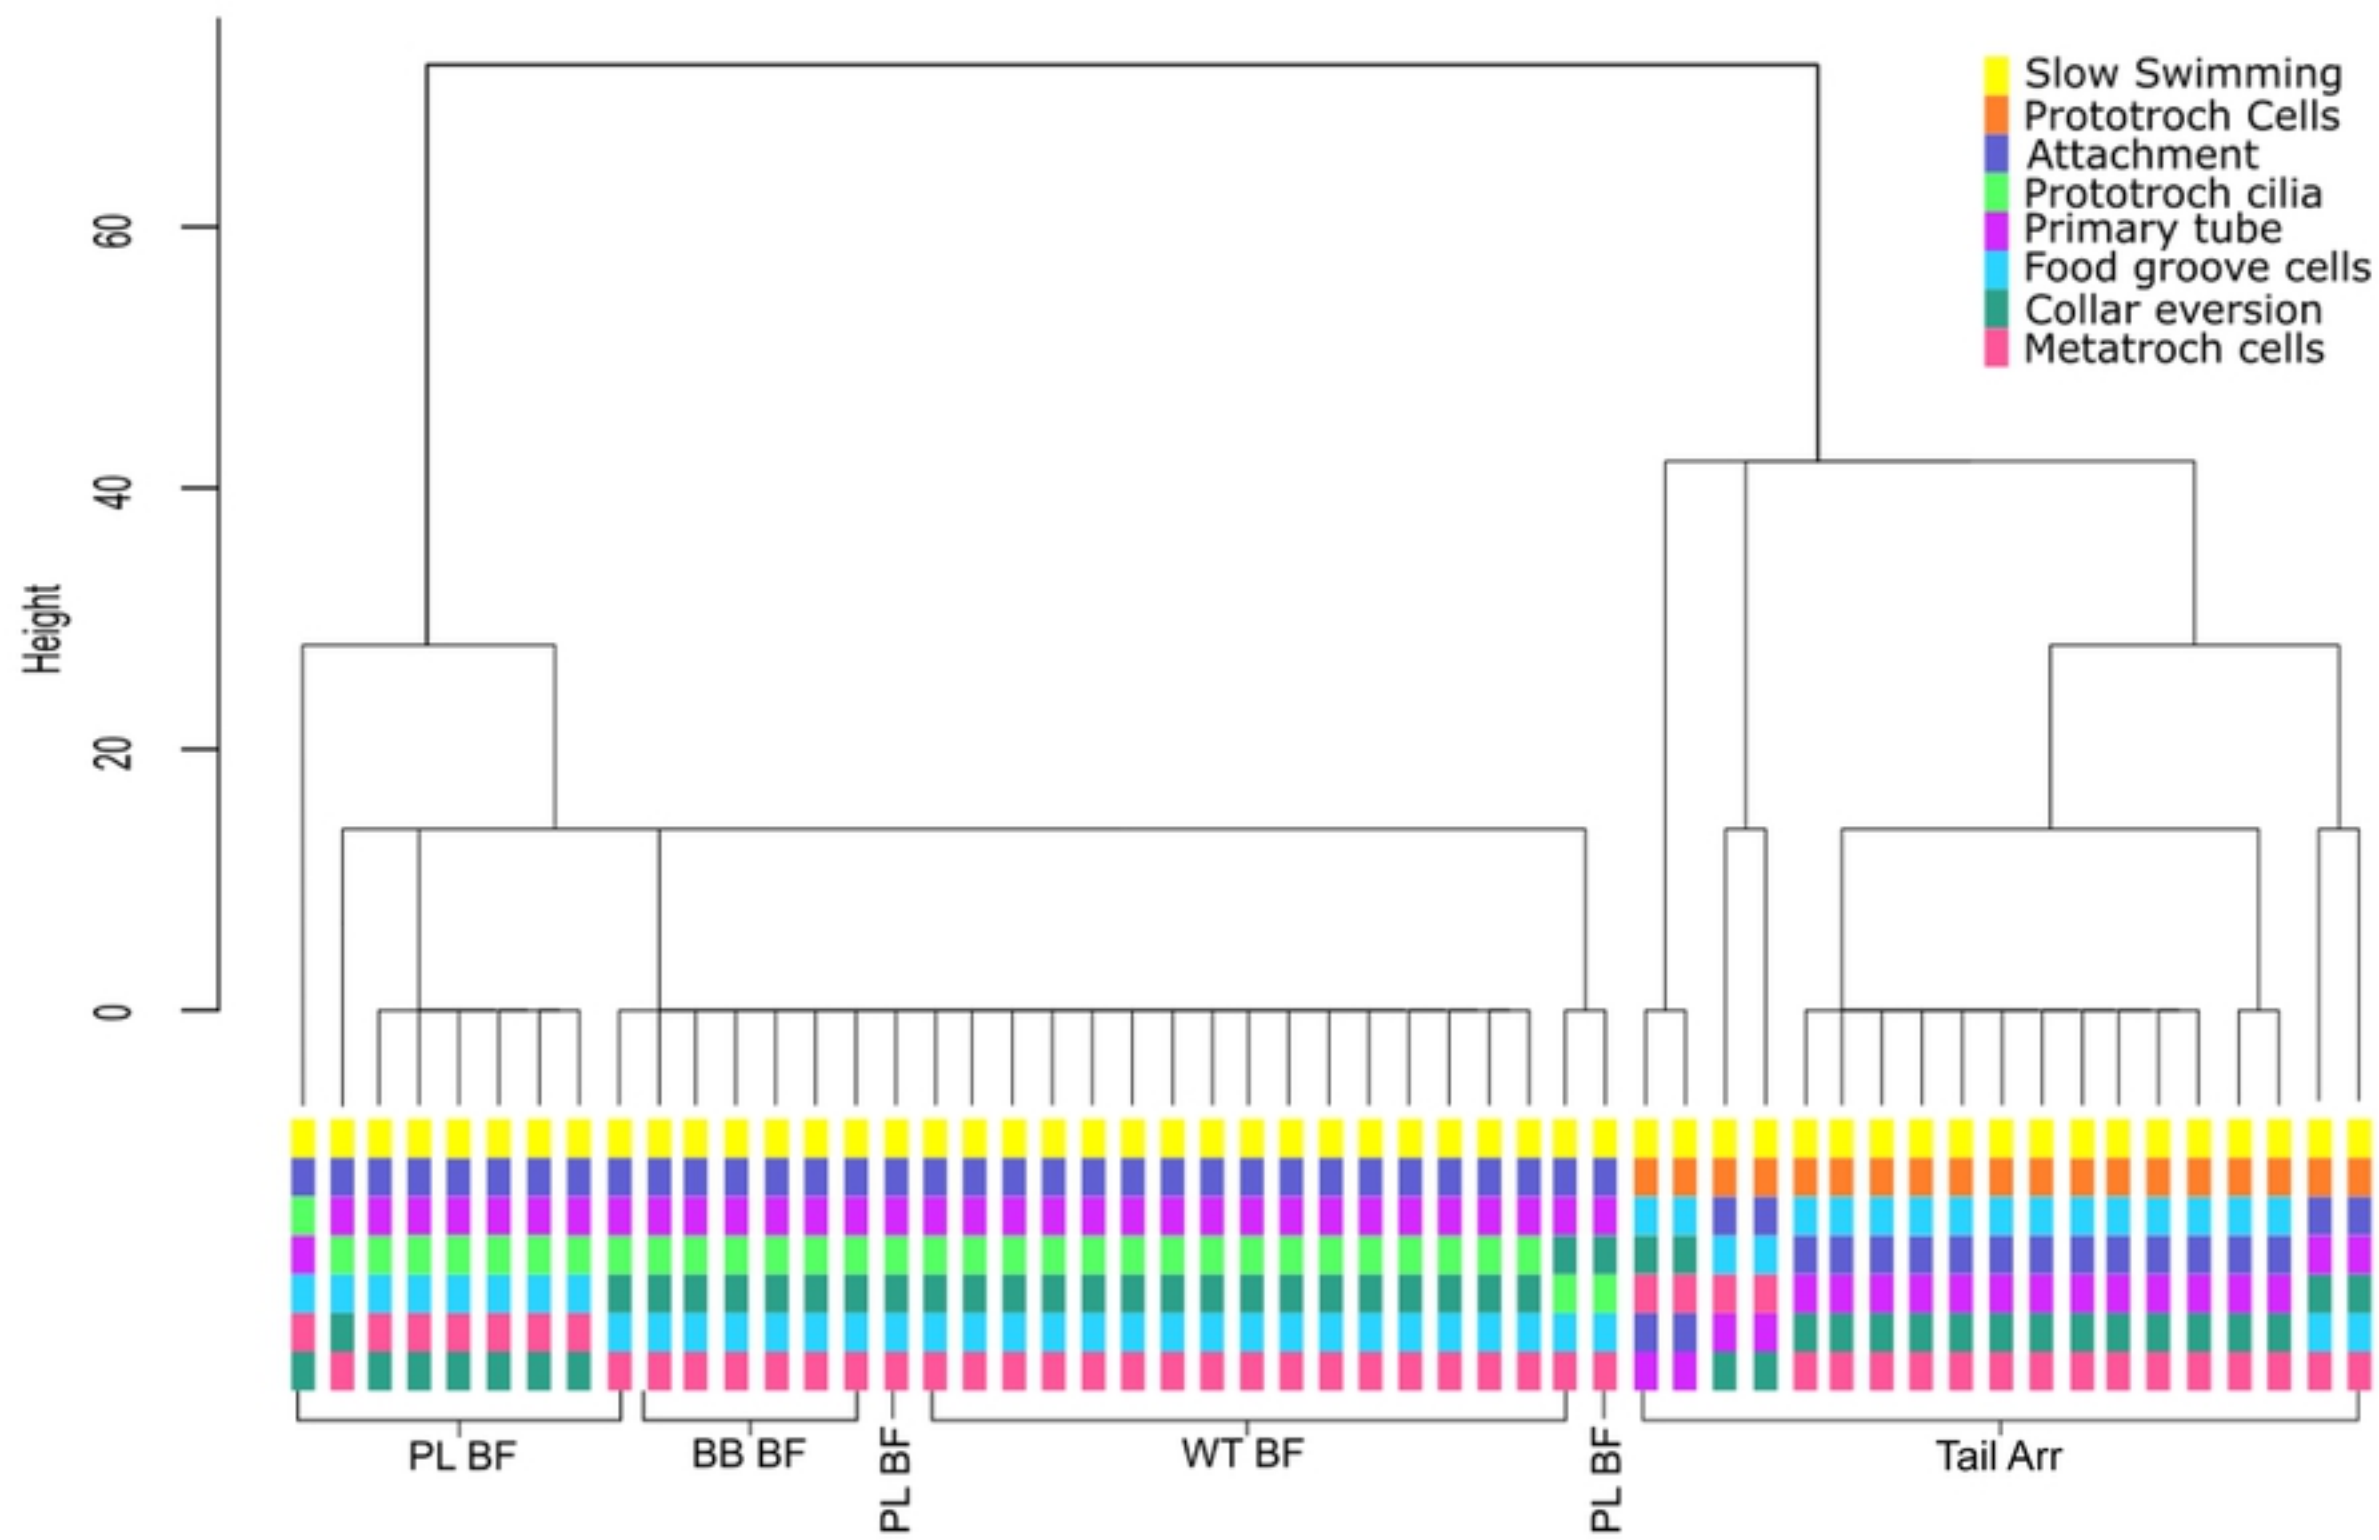

Figure 2

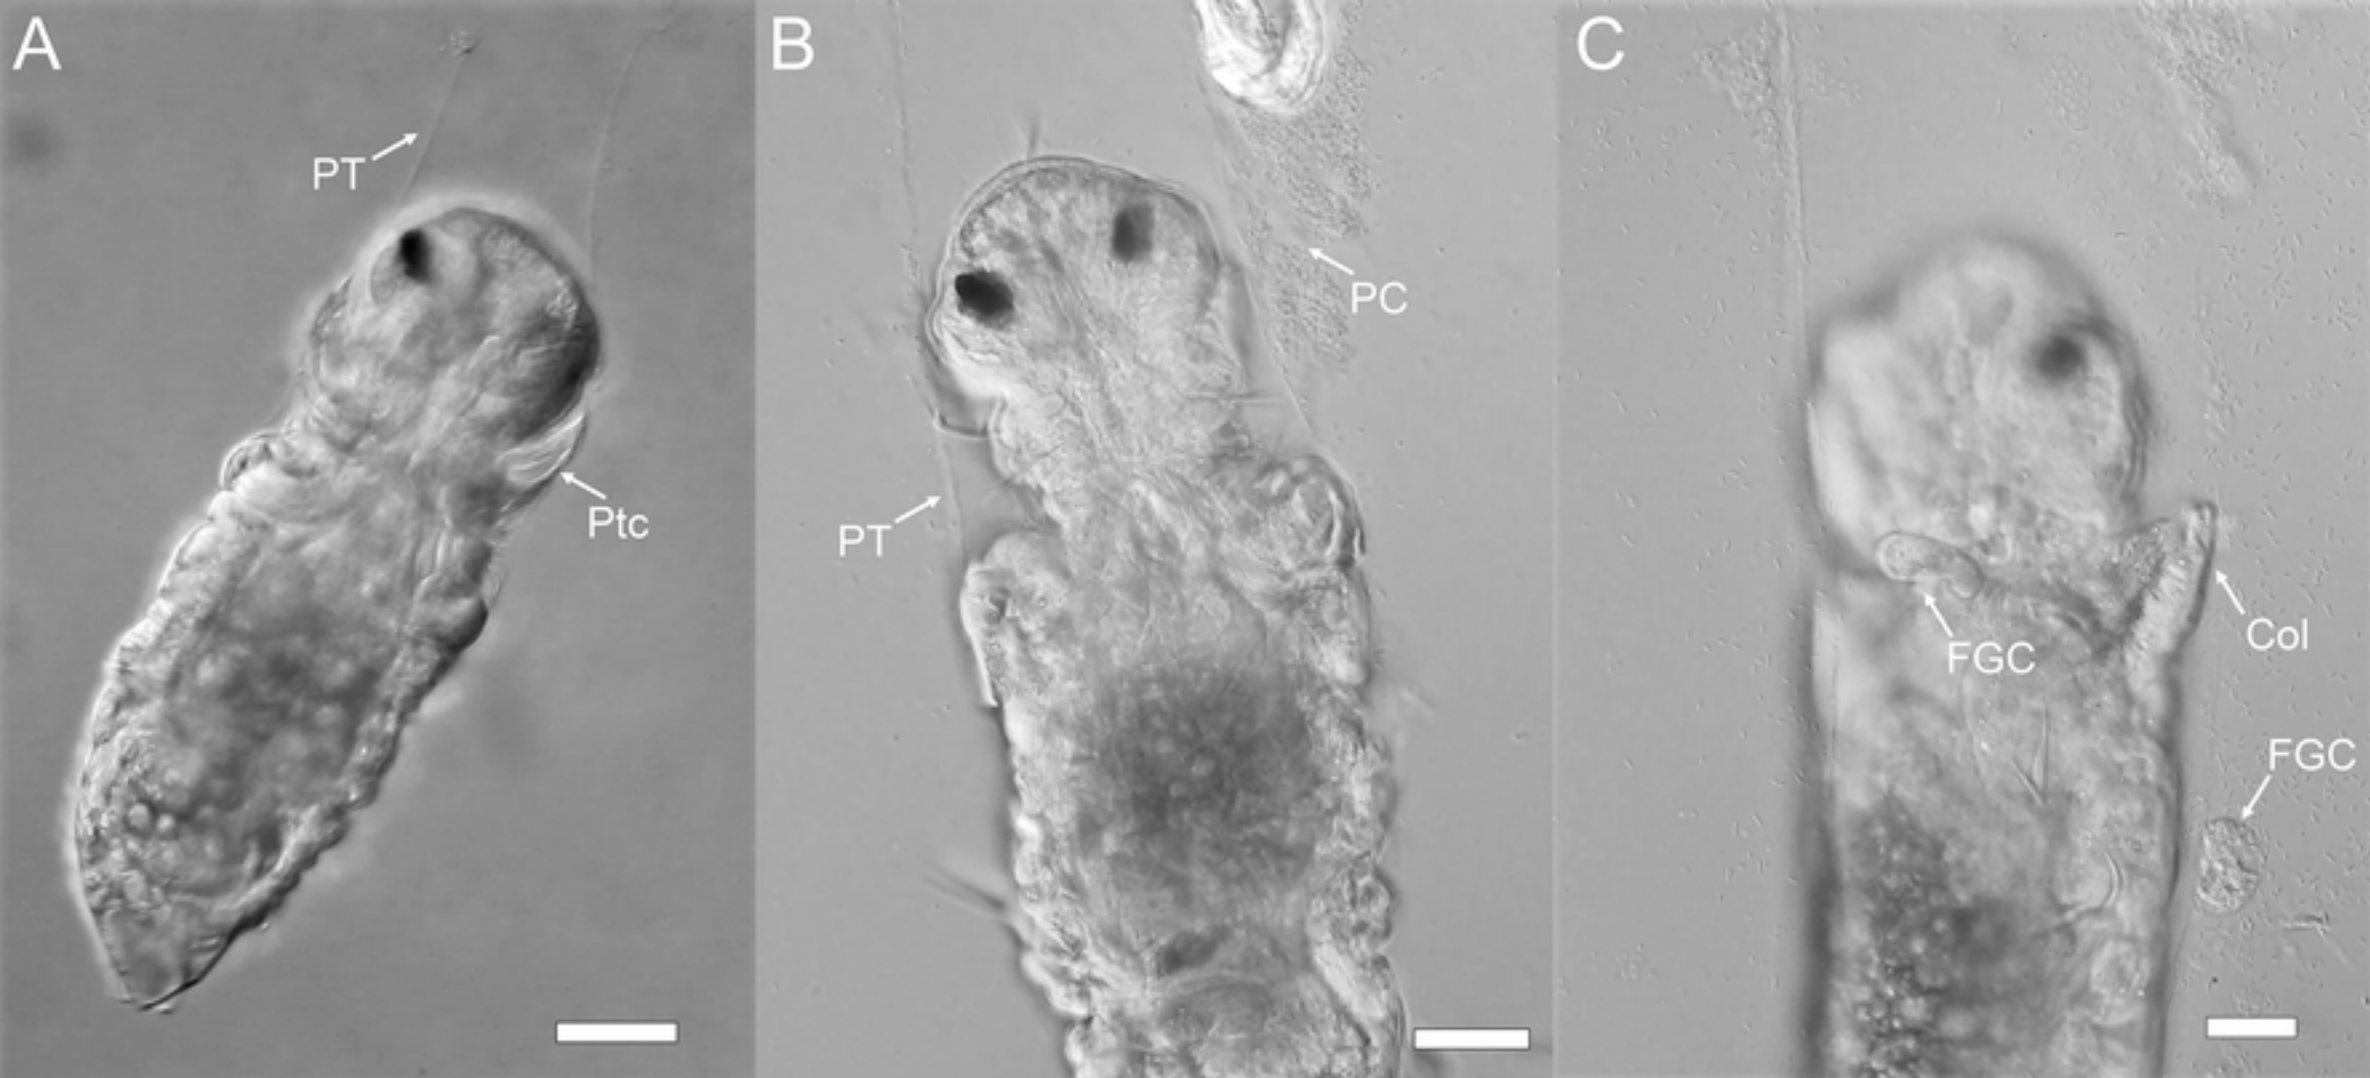

Figure 3

A

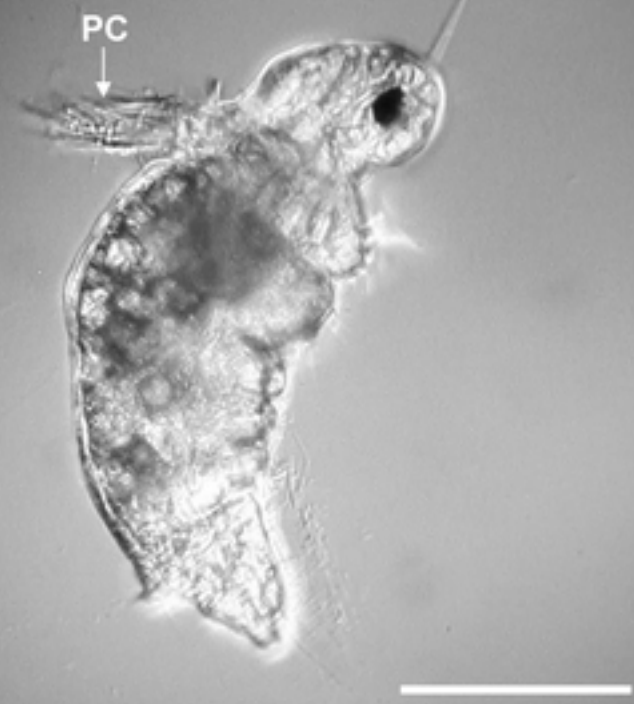

B

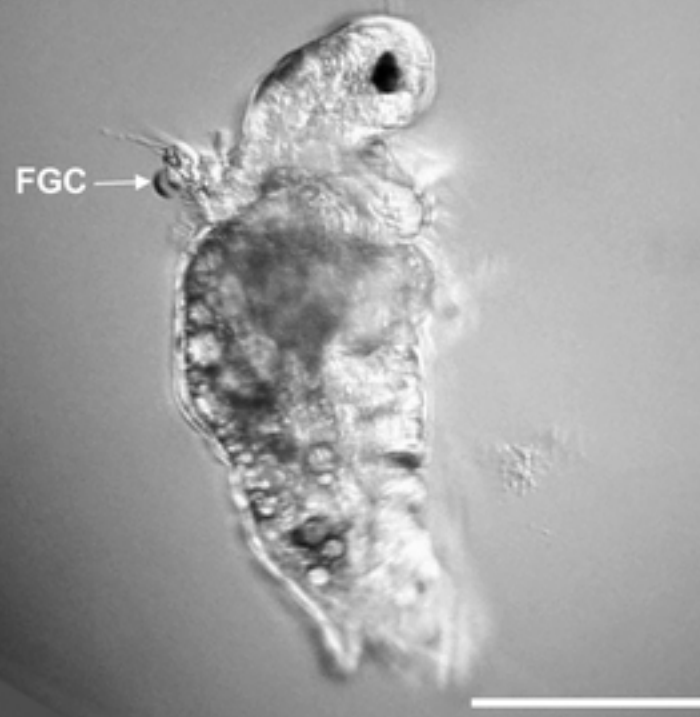

C

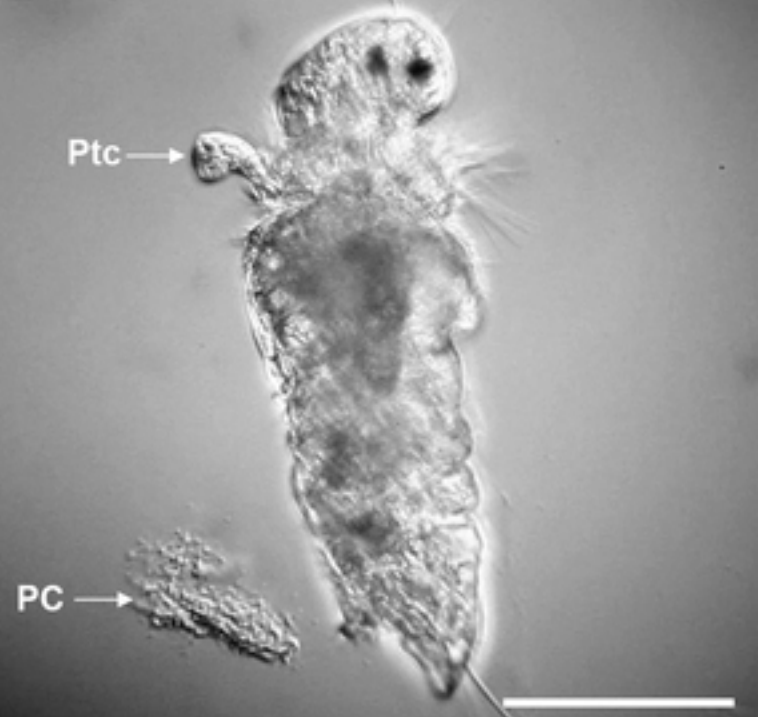

Figure 4

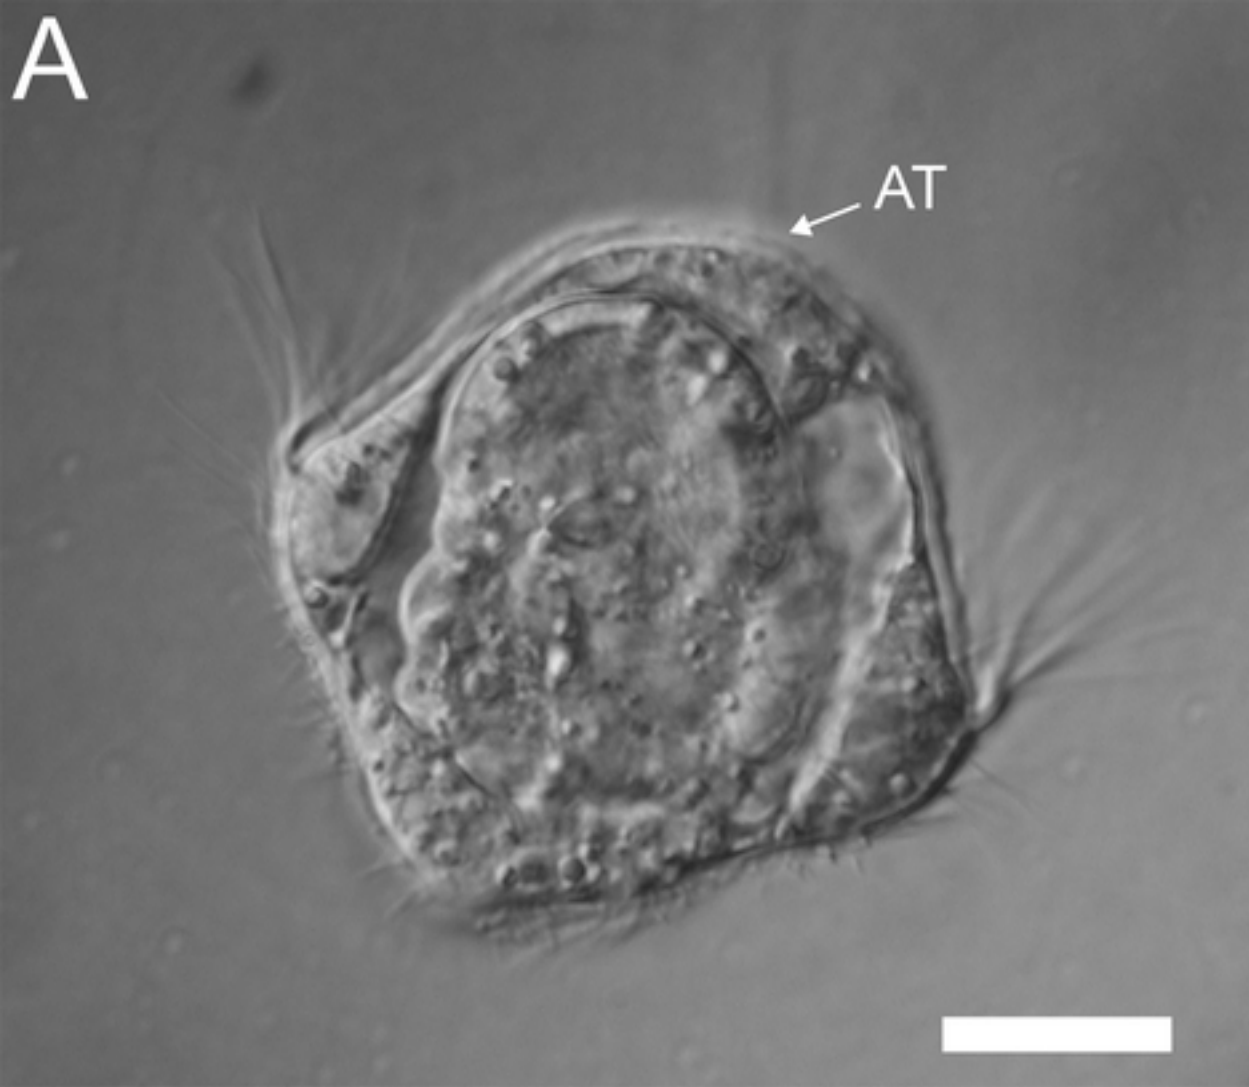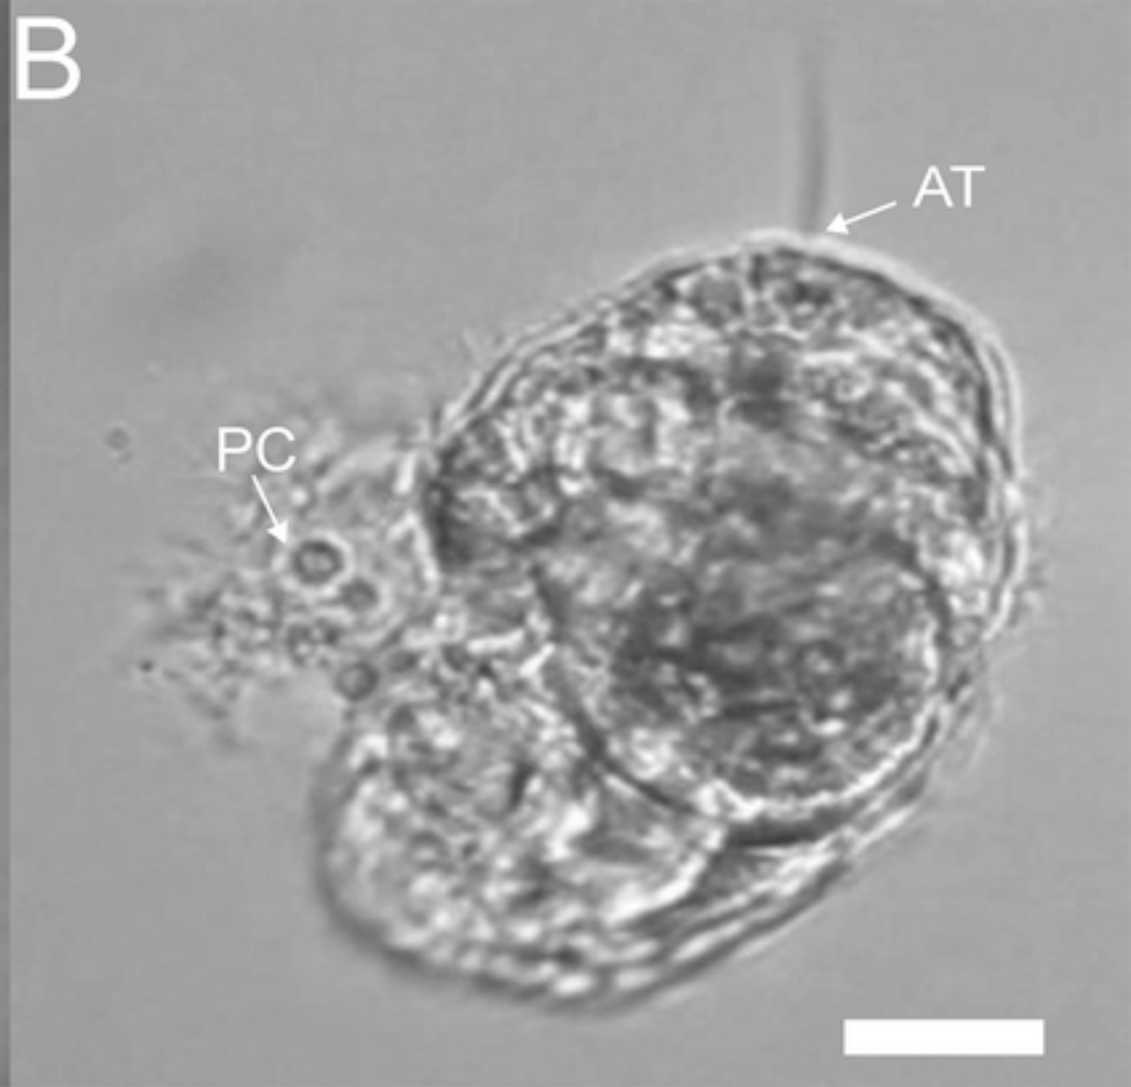

Figure 5

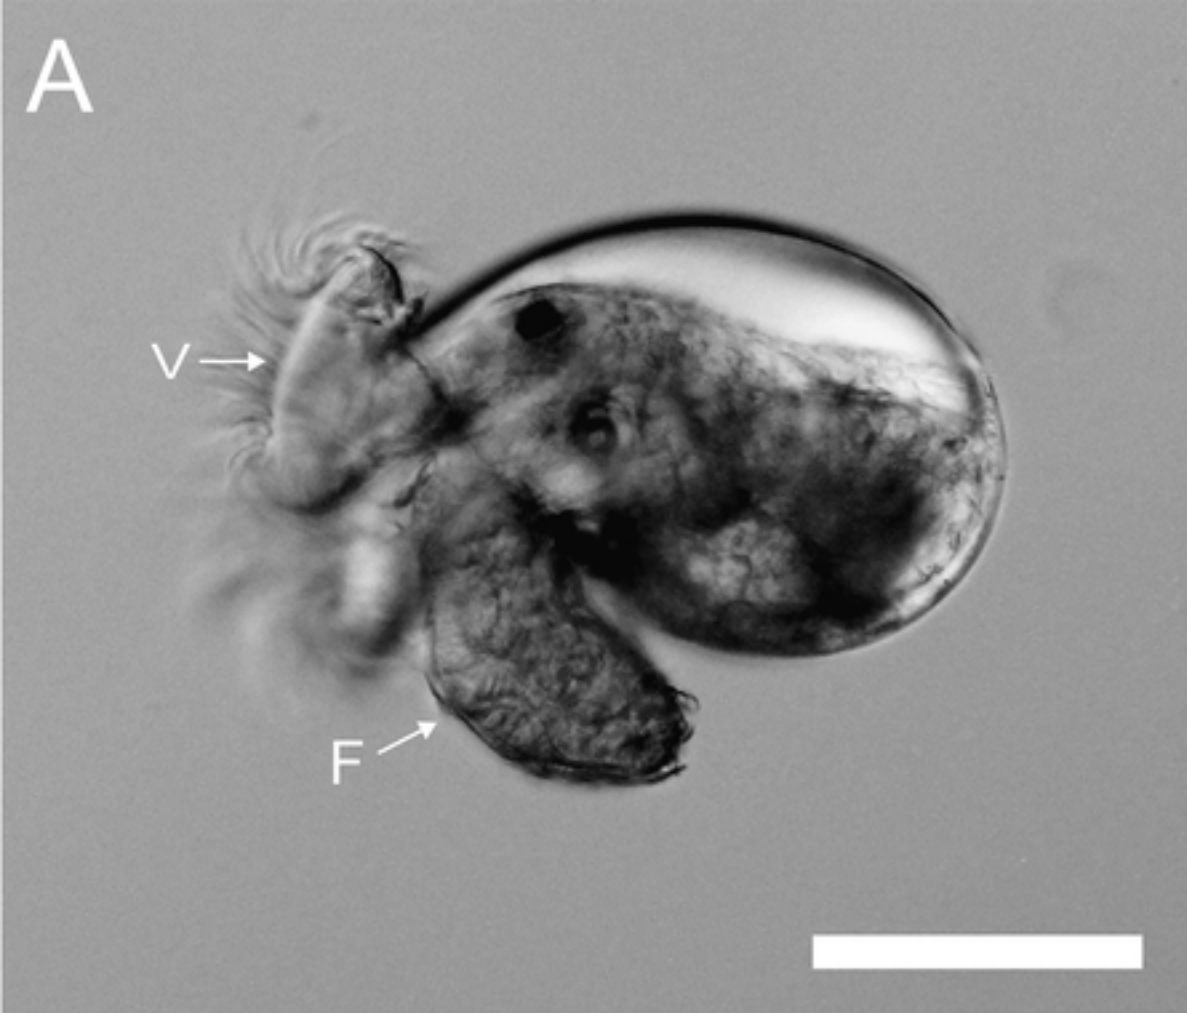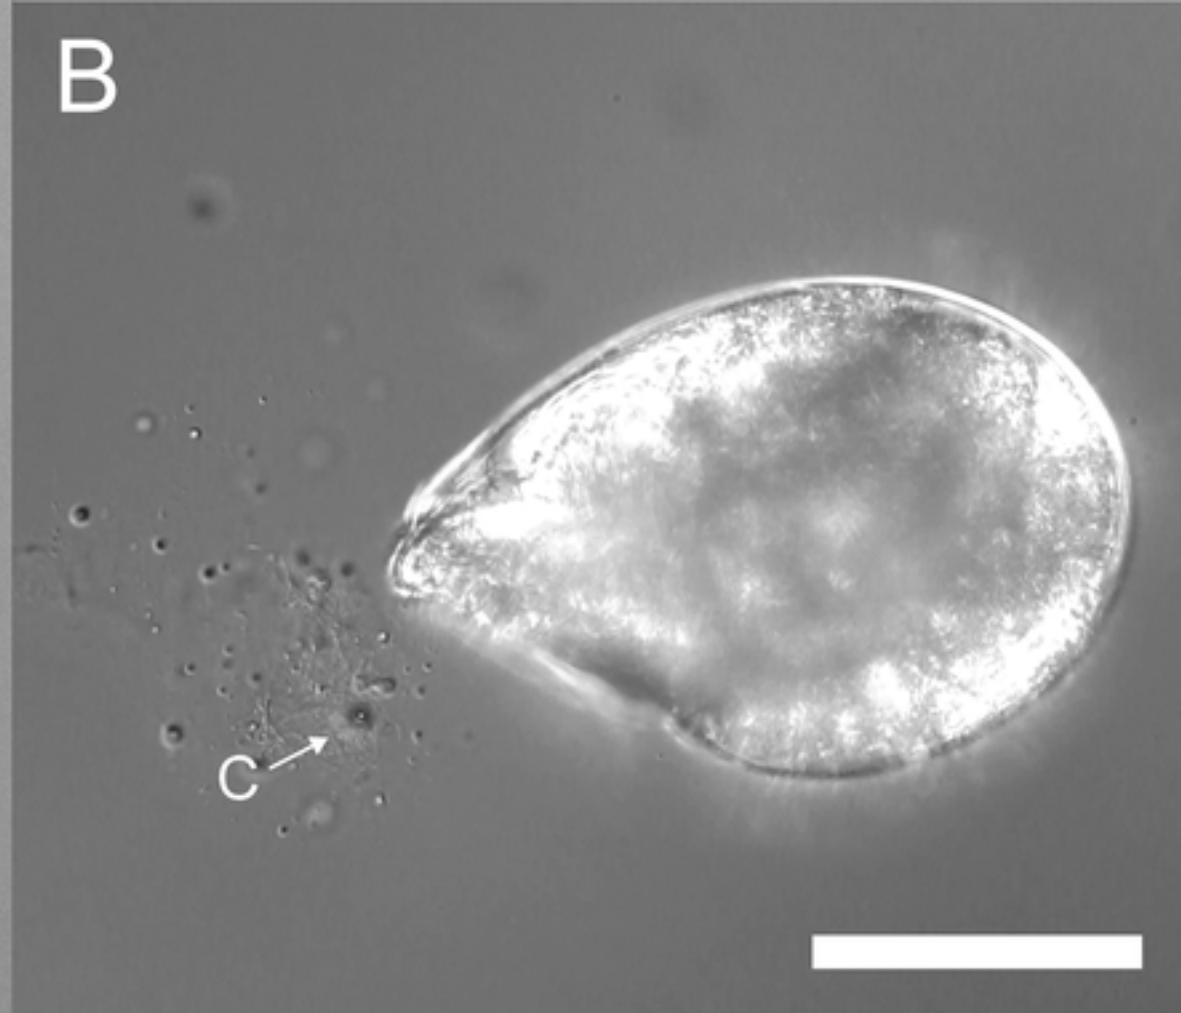

Figure 6
